# Supplementary material
Source: Springer Nature journal article supplement (https://www.springermedizin.de/resource/supplementary/12939_2010_182_MOESM1_ESM.pdf/9550622)

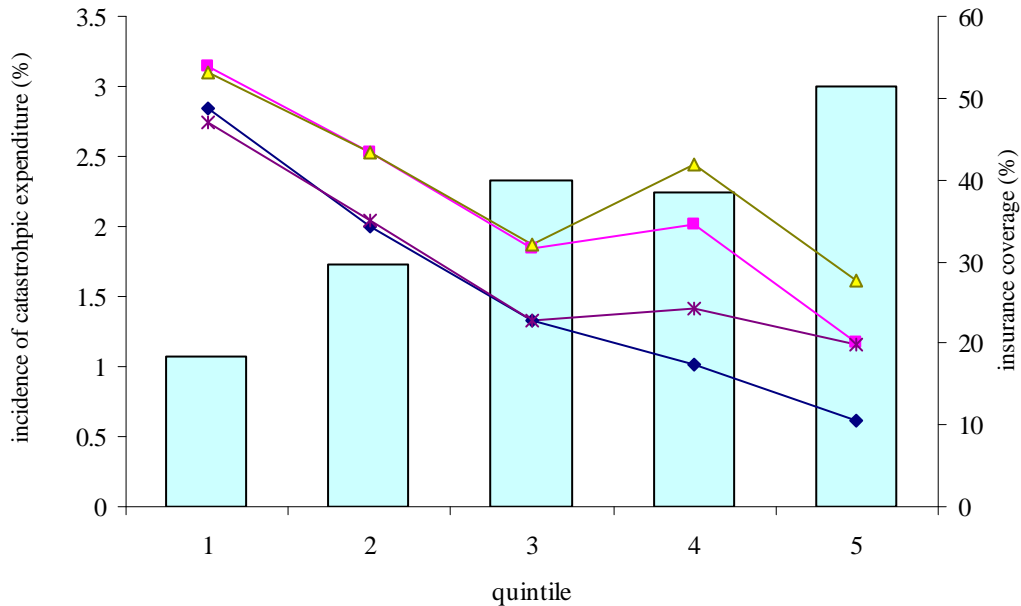

insurance
  10% non-food
  20% non-food
  10% income
  5% income

Supplement: MOESM1 [file 9550622]
